# Supplementary material
Source: PubMed Central journal article supplement (PMC5650931)

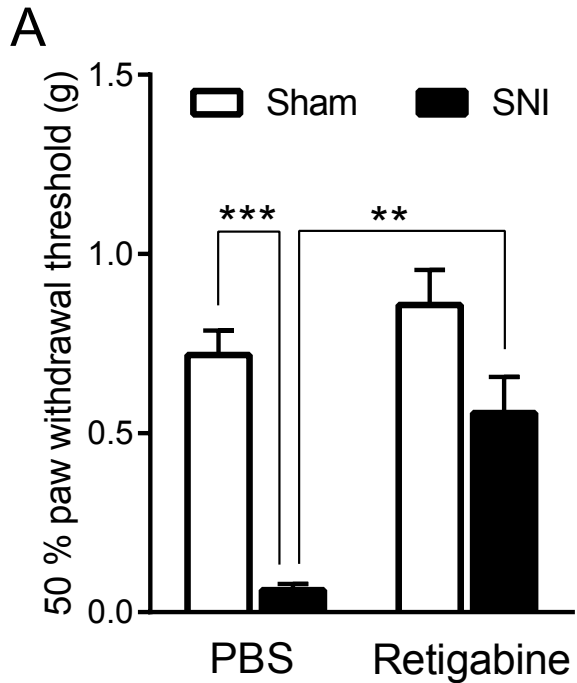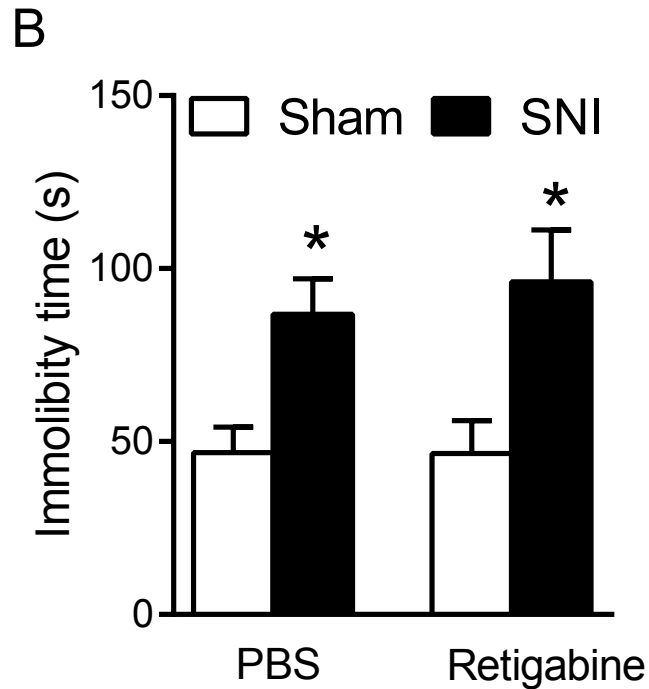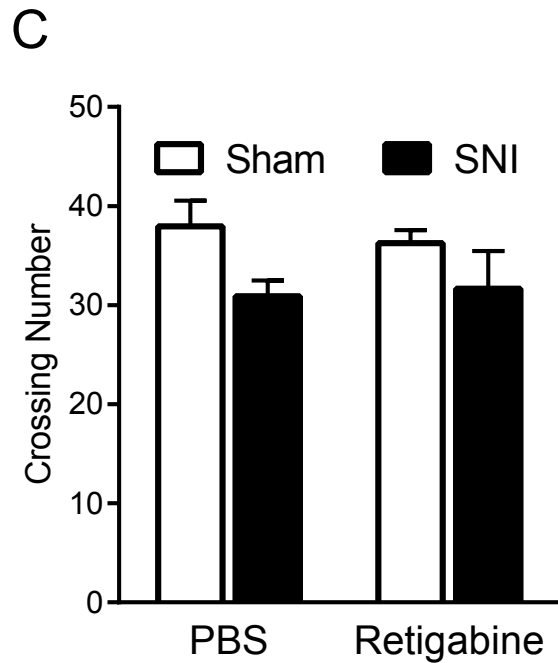

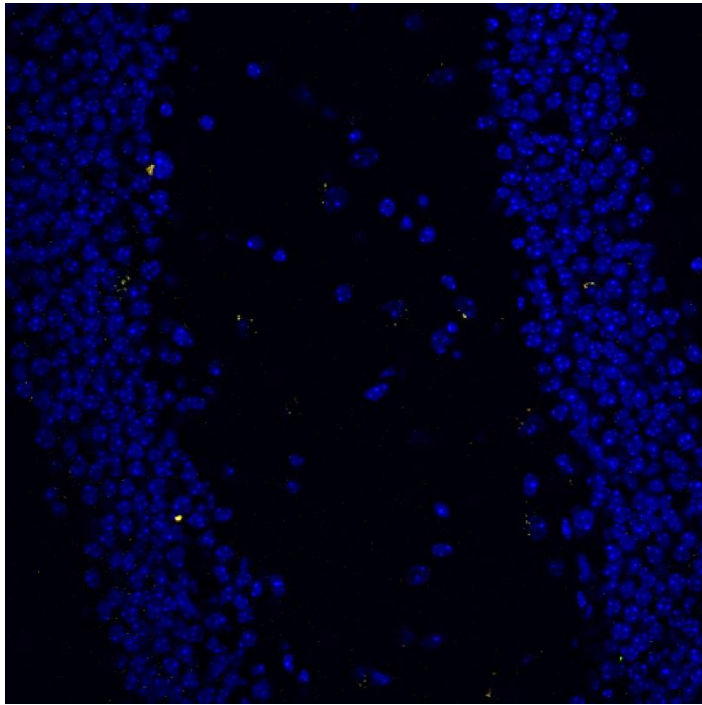

No Primary antibody

Fig. S2

Supplement: NIHMS895609-supplement.pdf [file NIHMS895609-supplement.pdf]
